# Supplementary material
Source: publisher site journal article supplement (https://www.dovepress.com/get_supplementary_file.php?f=482848.docx)
Supplement: Supplementary file 1 [file get_supplementary_file.php]

**Supplement 1.** BSI score breakdowns for patients with missing and complete data separately, including proportion of patients with 4-year mortality or 4-year hospitalisation.

| Clinical parameters | Complete data | | | Incomplete data | | |
| --- | --- | --- | --- | --- | --- | --- |
| BSI | n=169 | Mortality | Hospitalisation | n=287 | Mortality | Hospitalisation |
| Age (p-value) |  | 0.196 | 0.637 |  | <0.001* | 0.014* |
| - <50 years | 79 (46.8%) | 2 (2.5%) | 53 (67.1%) | 170 (59.2%) | 17 (10%) | 107 (62.9%) |
| - 50-69.9 years | 77 (45.6%) | 4 (5.2%) | 56 (72.7%) | 99 (34.5%) | 19 (19.2%) | 69 (69.7%) |
| - 70-79.9 years | 12 (7.1%) | 2 (16.7%) | 7 (58.3%) | 15 (5.2%) | 4 (26.7%) | 15 (100%) |
| - ≥80 years | 1 (0.6%) | 0 (0%) | 1 (100%) | 3 (1.1%) | 3 (100%) | 3 (100%) |
| BMI (p-value) |  | 0.232 | 0.257 |  |  |  |
| - BMI ≥18.5 kg/m2 | 134 (79.3%) | 5 (3.7%) | 90 (67.2%) | - | - | - |
| - BMI <18.5 kg/m2 | 35 (20.7%) | 3 (8.6%) | 28 (77.1%) | - | - | - |
| FEV1 (p-value) |  | 0.793 | 0.003* |  |  |  |
| - FEV1 ≥ 80% | 3 (1.8%) | 0 (0%) | 2 (66.7%) | - | - | - |
| - FEV1 50-79.9% | 49 (29%) | 3 (6.1%) | 24 (49%) | - | - | - |
| - FEV1 30-49.9% | 68 (40.2%) | 2 (2.9%) | 52 (76.5%) | - | - | - |
| - FEV1 < 30% | 49 (29%) | 3 (6.1%) | 39 /79.6%) | - | - | - |
| Significant hospitalisation in past 2 years (p-value) |  | 0.001* | <0.001* |  | <0.001* | <0.001* |
| - No | 111 (65.7%) | 1 (0.9%) | 59 (53.2%) | 184 (64.1%) | 15 (8.2%) | 91 (49.5%) |
| - Yes | 58 (34.3%) | 7 (12.1%) | 58 (100%) | 103 (35.9%) | 28 (27.2%) | 103 (100%) |
| Exacerbations in past year (p-value) |  | 0.753 | 0.346 |  | 0.204 | 0.087 |
| - < 3 | 167 (98.8%) | 8 (4.8%) | 115 (68.9%) | 281 (97.9%) | 41 (14.6%) | 188 (66.9%) |
| - ≥ 3 | 2 (1.2%) | 0 (0%) | 2 (100%) | 6 (2.1%) | 2 (33.3%) | 6 (100%) |
| Pseudomonas colonisation (p-value) |  | 0.675 | 0.011* |  | <0.001* | <0.001* |
| - No | 117 (69.2%) | 5 (4.3%) | 74 (63.3%) | 198 (69%) | 20 (10.1%) | 117 (59.1%) |
| - Yes | 52 (30.8%) | 3 (5.8%) | 43 (82.7%) | 89 (31%) | 23 (25.8%) | 77 (86.5%) |
| Other culture colonisation (p-value) |  | 0.818 | 0.021* |  | 0.035* | <0.001* |
| - No | 26 (15.4%) | 1 (3.9%) | 13 (50%) | 53 (15.4%) | 3 (5.7%) | 23 (43.4%) |
| - Yes | 143 (84.6%) | 7 (4.9%) | 104 (72.7%) | 143 (84.6%) | 40 (17.1%) | 171 (73.1%) |
| Radiological extent (p-value) |  | 0.362 | 0.769 |  | 0.365 | 0.376 |
| - <3 lobes and cystic type not reported | 110 (65.1%) | 4 (3.6%) | 77 (70%) | 162 (56.5%) | 27 (16.7%) | 113 (69.8%) |
| - ≥3 lobes or cystic type reported | 59 (34.9%) | 4 (6.8%) | 40 (67.8%) | 125 (43.6%) | 16 (12.8%) | 81 (64.8%) |
| Severity (absolute) (p-value) |  | 0.008* | <0.001* |  | <0.001* | <0.001* |
| - Mild | 50 (29.6%) | 0 (0%) | 22 (44%) | 148 (51.6%) | 7 (4.7%) | 62 (41.9%) |
| - Moderate | 57 (33.7%) | 1 (1.8%) | 37 (64.9%) | 82 (28.6%) | 17 (20.7%) | 75 (91.5%) |
| - Severe | 62 (36.7%) | 7 (11.3%) | 58 (93.6%) | 57 (19.9%) | 19 (33.3%) | 57 (100%) |
| Severity (relative) (p-value) |  | 0.007* | <0.001* |  | <0.001* | <0.001* |
| - Mild | 28 (16.6%) | 0 (0%) | 12 (42.9%) | 99 (34.5%) | 2 (2%) | 40 (40.4%) |
| - Moderate | 63 (37.3%) | 0 (0%) | 34 (54%) | 67 (23.3%) | 9 (13.4%) | 37 (55.2%) |
| - Severe | 78 (46.2%) | 8 (10.3%) | 71 (91%) | 121 (42.2%) | 32 (26.5%) | 117 (96.7%) |
|  |  |  |  |  |  |  |

* Indicates statistical significance at p<0.05.

Abbreviations: BMI, Body mass index; BSI, Bronchiectasis severity index; FEV1, Forced expiratory volume in one second.

**Supplement 2.** FACED score breakdowns for patients with missing and complete data separately, including proportion of patients with 4-year mortality or 4-year hospitalisation.

| Clinical parameters | Complete data | | | Incomplete data | | |
| --- | --- | --- | --- | --- | --- | --- |
| FACED | n=169 | Mortality | Hospitalisation | n=287 | Mortality | Hospitalisation |
| FEV1 |  | 0.675 | <0.001* |  |  |  |
| - FEV1 ≥ 50% | 52 (30.8%) | 3 (5.8%) | 26 (50%) | - |  |  |
| - FEV1 < 50% | 117 (69.2%) | 5 (4.3%) | 91 (77.8%) | - |  |  |
| Age |  | 0.060 | 0.535 |  | 0.003* | 0.002* |
| - < 70 years | 156 (92.3%) | 6 (3.9%) | 109 (69.9%) | 269 (93.7%) | 36 (13.4%) | 176 (65.4%) |
| - ≥ 70 years | 13 (7.7%) | 2 (15.4%) | 8 (61.5%) | 18 (6.3%) | 7 /38.9%) | 18 (100%) |
| Pseudomonas colonisation |  | 0.675 | 0.011* |  | <0.001* | <0.001* |
| - No | 117 (69.2%) | 5 (4.3%) | 74 (63.3%) | 198 (69%) | 20 (10.1%) | 117 (59.1%) |
| - Yes | 52 (30.8%) | 3 (5.8%) | 43 (82.7%) | 89 (31%) | 23 (25.8%) | 77 (86.5%) |
| Radiological extent |  | 0.265 | 0.892 |  | 0.792 | 0.856 |
| - < 2 lobes | 115 (68.1%) | 4 (3.5%) | 80 (69.6%) | 175 (61%) | 27 (15.4%) | 119 (68%) |
| - ≥ 3 lobes | 54 (31.9%) | 4 (7.4%) | 37 (68.5%) | 112 (39%) | 16 (14.3%) | 75 (67%) |
| Severity (absolute) |  | 0.288 | 0.045* |  | <0.001* | 0.019* |
| - Mild | 93 (55%) | 3 (3.2%) | 57 (61.3%) | 276 (96.2%) | 37 (13.4%) | 183 (66.3%) |
| - Moderate | 70 (41.4%) | 4 (5.7%) | 55 (78.6%) | 11 (3.8%) | 6 (54.6%) | 11 (100%) |
| - Severe | 6 (3.6%) | 1 (16.7%) | 5 (83.3%) | 0 (0%) | - | - |
| Severity (relative) |  | 0.288 | 0.045* |  | <0.001* | <0.001* |
| - Mild | 93 (55%) | 3 (3.2%) | 57 (61.3%) | 230 (80.1%) | 28 (12.2%) | 141 (61.3%) |
| - Moderate | 70 (41.4%) | 4 (5.7%) | 55 (78.6%) | 46 (16%) | 9 (19.6%) | 42 (91.3%) |
| - Severe | 6 (3.6%) | 1 (16.7%) | 5 (83.3%) | 11 (3.8%) | 6 (54.6%) | 11 (100%) |

* Indicates statistical significance at p<0.05.

Abbreviations: FACED: Forced expiratory volume in 1 s (FEV1), Age, Chronic colonization, Extension, and Dyspnea: FEV1, Forced expiratory volume in one second.

**Supplement 3.** Proportion of patients deceased or with a hospitalisation by absolute and relative severity for **BSI** and **FACED** categorisations.

| Assessment scales | Absolute | | | Relative | | |
| --- | --- | --- | --- | --- | --- | --- |
| BSI | Mild | Moderate | Severe | Mild | Moderate | Severe |
| 1-year mortality | 2 (1%) | 3 (2.2%) | 6 (5%) | 1 (0.8%) | 1 (0.8%) | 9 (4.5%) |
| 1-year hospitalisation | 28 (14.1%) | 73 (52.5%) | 108 (90.8%) | 17 (13.4%) | 25 (19.2%) | 167 (83.9%) |
| 2-year mortality | 4 (2%) | 8 (5.8%) | 12 (10.1%) | 2 (1.6%) | 4 (3.1%) | 18 (9%) |
| 2-year hospitalisation | 43 (21.7%) | 84 (60.4%) | 110 (92.4%) | 23 (18.1%) | 43 (33.1%) | 171 (85.9%) |
| 3-year mortality | 5 (2.5%) | 13 (9.4%) | 19 (16%) | 2 (1.6%) | 6 (4.6%) | 29 (14.6%) |
| 3-year hospitalisation | 66 (33.3%) | 98 (70.5%) | 112 (94.1%) | 42 (33.1%) | 55 (42.3%) | 179 (89.9%) |
| 4-year mortality | 7 (3.5%) | 18 (12.9%) | 26 (21.8%) | 2 (1.6%) | 9 (6.9%) | 40 (20.1%) |
| 4-year hospitalisation | 84 (42.4%) | 112 (80.6%) | 115 (96.6%) | 52 (40.9%) | 71 (54.6%) | 188 (94.5%) |
| 5-year mortality | 10 (5.1%) | 26 (18.7%) | 31 (26.1%) | 3 (2.4%) | 13 (10%) | 51 (25.6%) |
| 5-year hospitalisation | 103 (52%) | 125 (89.9%) | 115 (96.6%) | 64 (50.4%) | 87 (66.9%) | 192 (96.5%) |
| FACED | Mild | Moderate | Severe | Mild | Moderate | Severe |
| 1-year mortality | 10 (2.7%) | 1 (1.2%) | 0 (0%) | 8 (2.5%) | 2 (1.7%) | 1 (5.9%) |
| 1-year hospitalisation | 158 (42.8%) | 46 (56.8%) | 5 (83.3%) | 128 (39.6%) | 70 (60.3%) | 11 (64.7%) |
| 2-year mortality | 21 (5.7%) | 3 (3.7%) | 0 (0%) | 16 (5%) | 5 (4.3%) | 3 (17.6%) |
| 2-year hospitalisation | 180 (48.8%) | 52 (64.2%) | 5 (83.3%) | 143 (44.3%) | 83 (71.6%) | 11 (64.7%) |
| 3-year mortality | 30 (8.1%) | 6 (7.4%) | 1 (16.7%) | 22 (6.8%) | 10 (8.6%) | 5 (29.4%) |
| 3-year hospitalisation | 214 (58%) | 57 (70.4%) | 5 (83.3%) | 173 (53.6%) | 90 (77.6%) | 13 (76.5%) |
| 4-year mortality | 40 (10.8%) | 10 (12.3%) | 1 (16.7%) | 31 (9.6%) | 13 (11.2%) | 7 (41.2%) |
| 4-year hospitalisation | 240 (65%) | 66 (81.5%) | 5 (83.3%) | 198 (61.3%) | 97 (83.6%) | 16 (94.1%) |
| 5-year mortality | 50 (13.6%) | 14 (17.3%) | 3 (50%) | 40 (12.4%) | 18 (15.5%) | 9 (52.9%) |
| 5-year hospitalisation | 266 (72.1%) | 72 (88.9%) | 5 (83.3%) | 222 (68.7%) | 105 (90.5%) | 16 (94.1%) |

Abbreviations: BSI, Bronchiectasis severity index; FACED: Forced expiratory volume in 1 s (FEV1), Age, Chronic colonization, Extension, and Dyspnea:
